# Supplementary material
Source: PubMed Central journal article supplement (PMC2553610)
Supplement: tpc.108.059188_1.pdf [file tpc.108.059188_1.pdf]

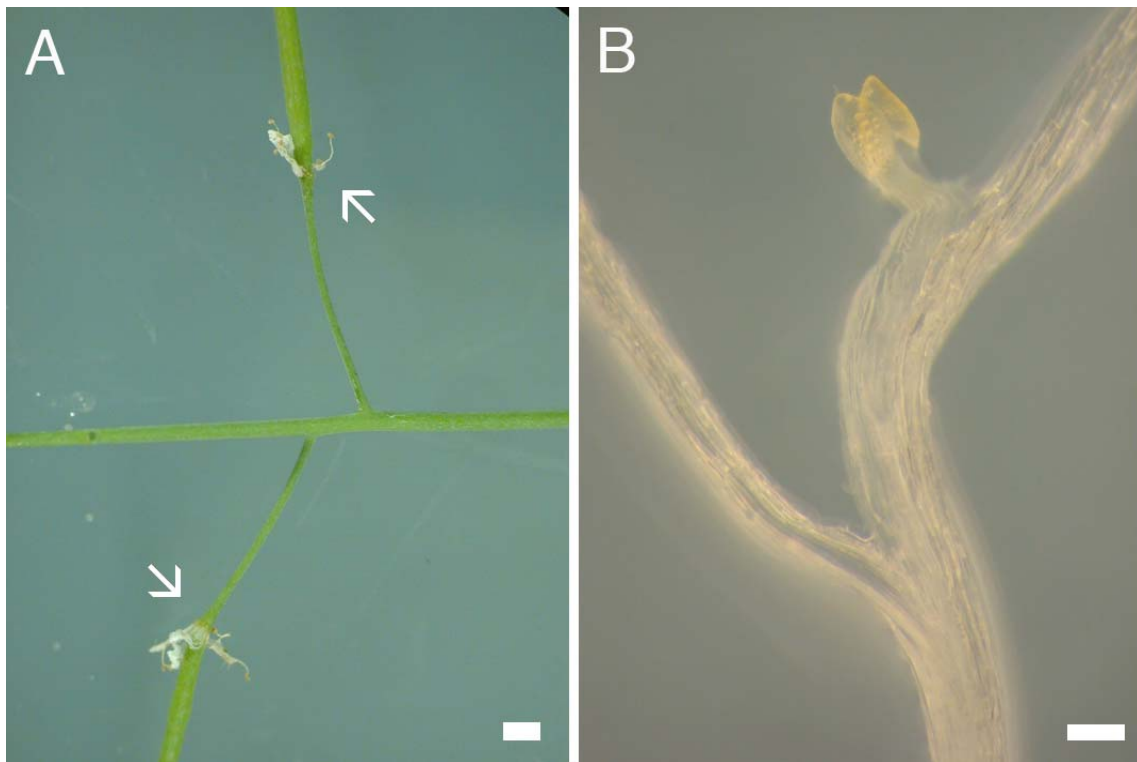

Supplemental Figure 1: *ath1-1* phenotypes are comparable to those of *ath1-3*.

(A) Part of a mature inflorescence; arrows indicate stamens that remained attached to the base of developing siliques (compare with *ath1-3* in Figure 1).

(B) Displaced shoot apex (arrow) in a two week-old seedling grown in the dark on medium supplemented with 1% sucrose (compare with *ath1-3* in Figure 4). Size bars: 1 mm (A), 100  $\mu$ m (B).

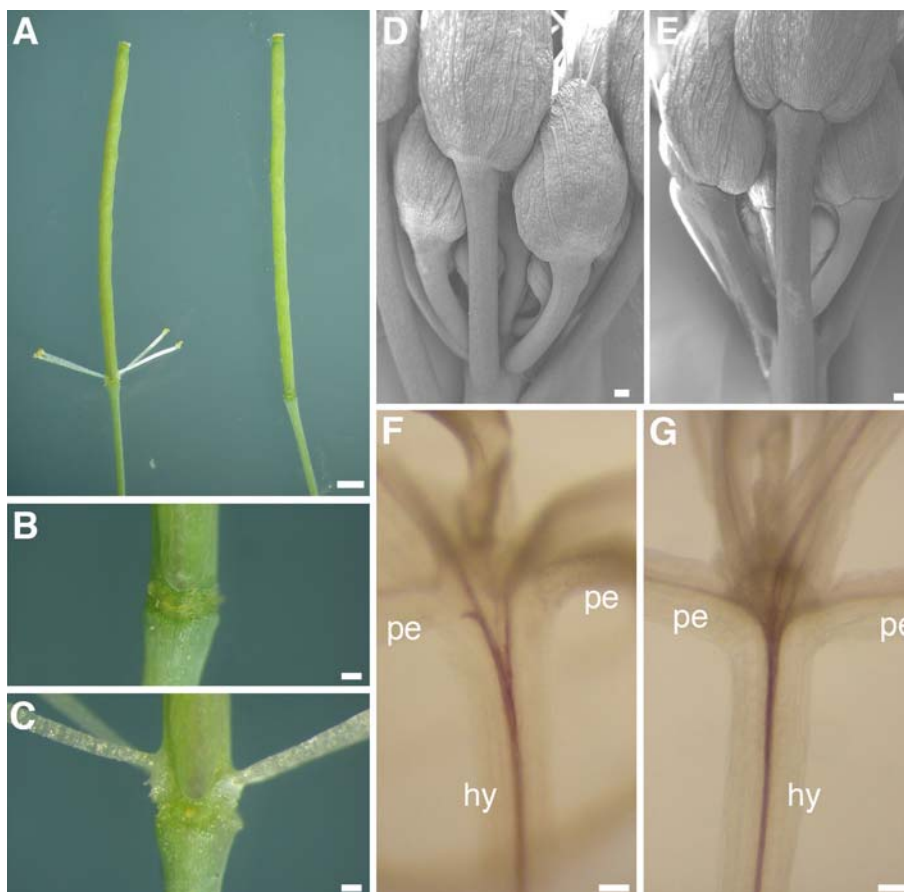

Supplemental Figure 2: Complementation of *ath1-3*.

(A) Developing siliques of *ath1-3* (left), with stamens still attached, and of complemented line (*ath1-3 ATH1:ATH1*, on the right), with stamen dehiscence restored. (B,C) Close-up of the base of the silique in *ath1-3* (C) and in *ath1-3 ATH1:ATH1* (B). (D,E) Scanning electron micrograph showing the basal boundaries of sepals in *ath1-3* (D) and in *ath1-3 ATH1:ATH1* (E). (F,G) Vascular strands in the shoot apex of two week-old *ath1-3* (F) and *ath1-3 ATH1:ATH1* (G) seedlings; hy: hypocotyls; pe: petiole. Size bars: 1 mm (A), 100  $\mu$ m (D-G).

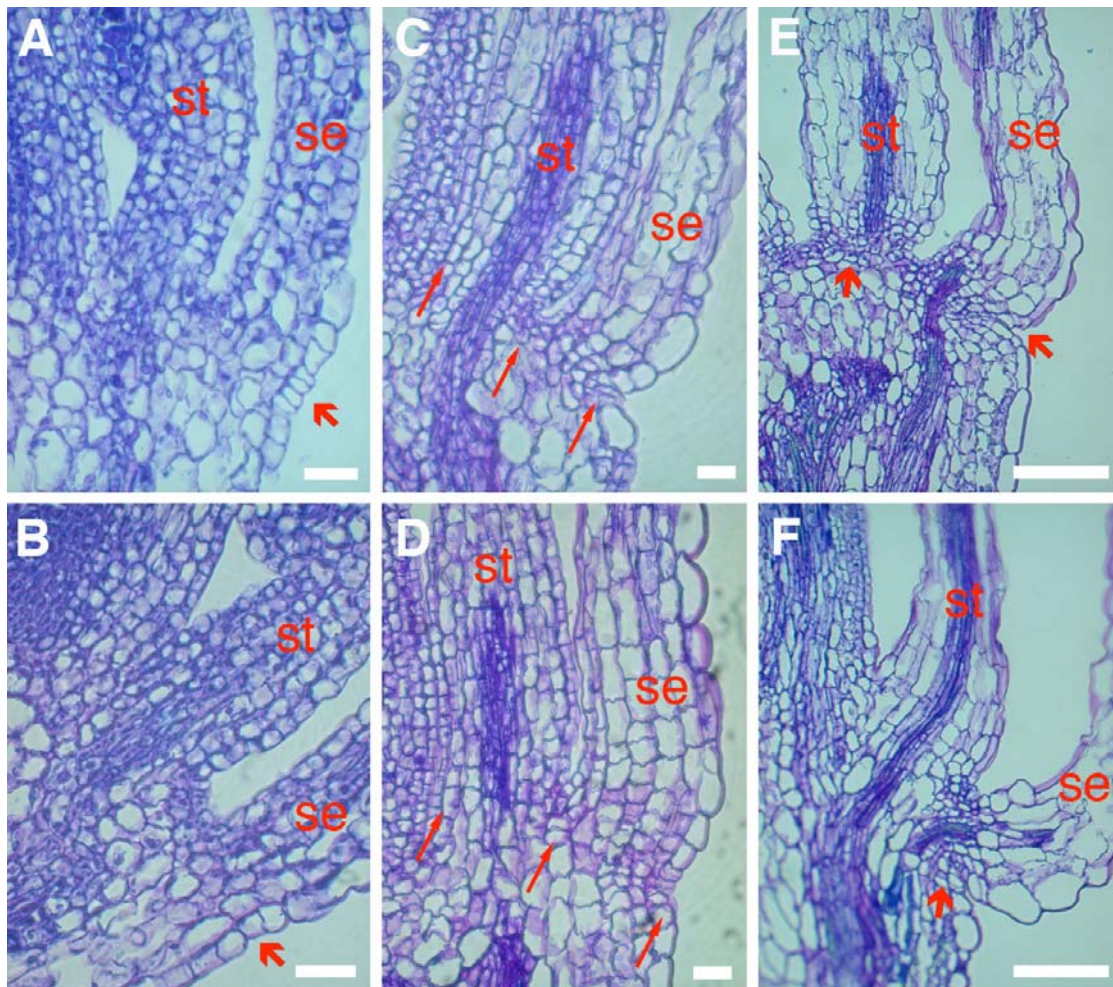

Supplemental Figure 3: Development of the basal region of stamens and sepals in the wild type and in *ath1-3*. st: stamen; se: sepal.

(A,B) Sections through stage 8 wild-type (A) and *ath1-3* (B) buds. Arrows indicate the boundary between sepal and pedicel. Note the row of small cells visible in the wild-type but absent in the mutant.

(C,D) Sections through stage 11 wild-type (C) and *ath1-3* (D) buds. Arrows indicate the limits between adjacent organs, at their junction with the pedicel. Note that, compared to the wild type, the junction with the pedicel in *ath1-3* is less constricted and the region between the sepal and the stamen has larger cells .

(E,F) Sections through stage 13 wild-type (E) and *ath1-3* (F) flowers. Note that although the abscission zone (arrows) has developed at the base of the sepal in *ath1-3* flowers, it is absent from the stamen; the base of the stamen is also partially fused with the carpel. Size bars: 20  $\mu\text{m}$  (A-D) and 100  $\mu\text{m}$  (E,F).

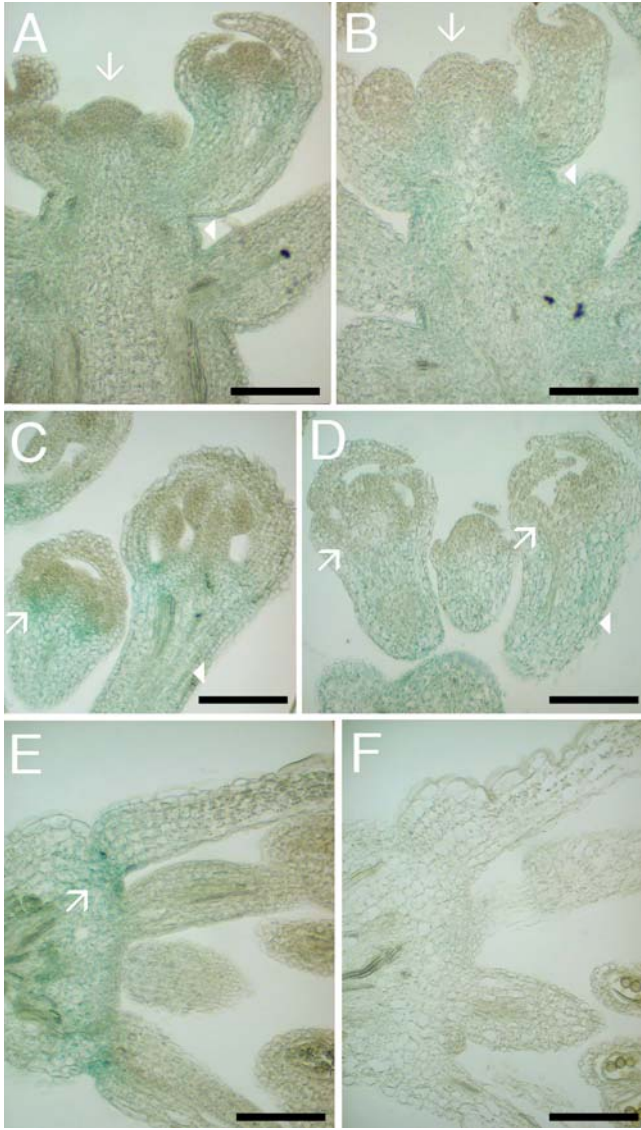

Supplemental Figure 4: Sections through GUS-stained wild-type *BP:GUS* and *ath1-3 BP:GUS* inflorescences.

(A,B) Sections through the inflorescence apex of wild-type (A) and *ath1-3* (B). Note that in *ath1-3*, *BP:GUS* expression is not detectable in the inflorescence meristem (arrows), while it is expressed at wild-type levels in the subtending stem (arrowheads).

(C,D) Sections through early (stage 6-7 buds of the wild type (C) and *ath1-3* (D); note that *BP:GUS* expression at the base of developing stamens (arrow) is lower in *ath1-3*, whereas expression in the pedicel (arrowheads) is comparable to the wild type.

(E,F) Sections through late (stage 10-11) floral buds; note that the expression at the base of the flower (arrow in E) is absent in *ath1-3*. Size bars: 100  $\mu$ m.

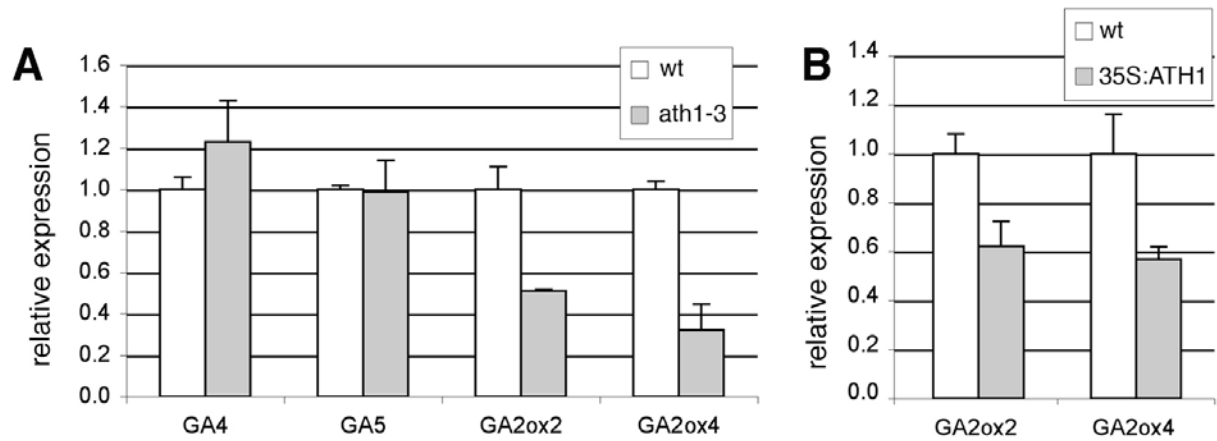

Supplemental Figure 5: Expression of gibberellin homeostasis genes in the wild type, *ath1-3* and *35S:ATH1*, measured by quantitative RT-PCR. The vertical axes show expression levels relative to the average of the wild type; the bars show the average and standard deviation for three to five independent RNA extractions. (A) Expression of *GA4*, *GA5*, *GA2ox2* and *GA2ox4* in 2 week-old wild-type and *ath1-3* seedlings (whole rosettes). (B) Expression of *GA2ox2* and *GA2ox4* in wild-type and *35S:ATH1* inflorescences.

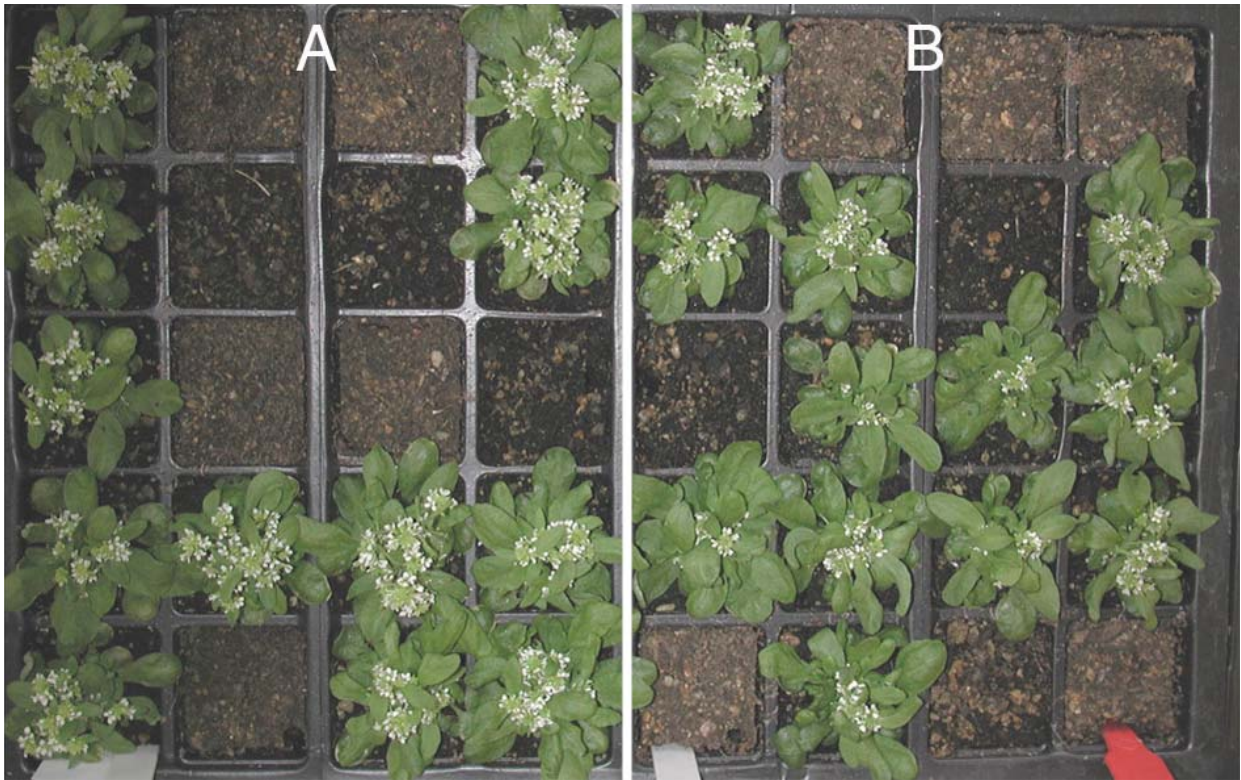

Supplemental Figure 6: External gibberellin treatment did not restore inflorescence stem growth in *35S:ATH1* plants.

(A) *35S:ATH1* plants treated for seven days with 100  $\mu$ M GA3; note the multiple axillary inflorescence stems clustered together on the rosette.  
(B) Untreated *35S:ATH1* control plants.

**Supplemental Table 1: oligonucleotides used for QRT-PCR**

|            |                                |
|------------|--------------------------------|
| APT for    | TCCCAGAATCGCTAAGATTGCC         |
| APT rev    | CCTTTCCCTTAAGCTCTG             |
| GA4 for    | CCA ACA TCA CCT CAA CTA CTG    |
| GA4 rev    | CTC TTT CCA TGT CAC CGA TTG    |
| GA5 for    | ACATGGGTTTCAGCCATTTGGGAAGGTGTA |
| GA5 rev    | AGATGGGTTTGGTGAGCCAATCTGAAAAGG |
| ATH1 for   | AGG CGG GTT TCG GAT CTA CAT    |
| ATH1 rev   | TTA TTT ATG CAT TGC TTG GCT    |
| GA2ox2 F   | GTG TCG TAC AAG GTG TTG GAG A  |
| GA2ox2 R   | CCA AGT CTA TAA TCA CCA AGC    |
| GA2ox4 for | CTGAGAGTGAATCATTATCCACCG       |
| GA2ox4 rev | TACGCACGTTTCTTGTA CTGC         |
